# Supplementary material
Source: Springer Nature journal article supplement (https://www.springermedizin.de/resource/supplementary/12936_2007_489_MOESM2_ESM.pdf/9547830)

(A) 3D7-745

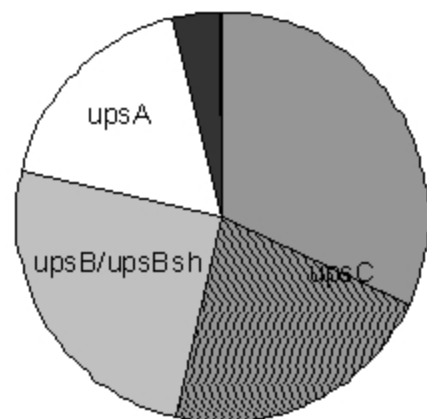

(B) 3D7-CD36

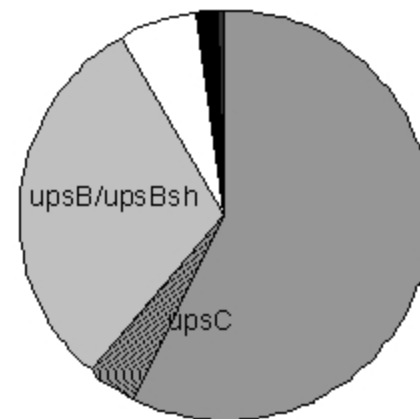

(C) 3D7-ICAM

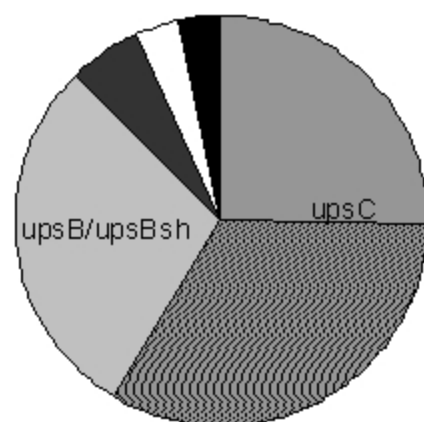

(D) 3D7-Selectin

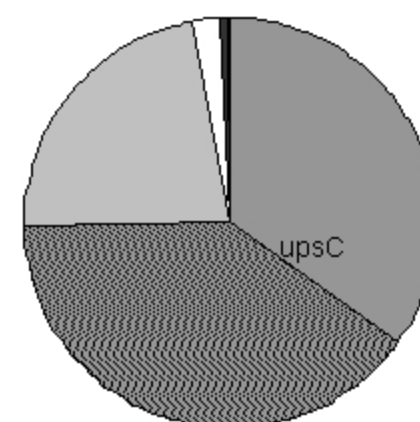

□ upsA    □ upsB/upsBsh    □ upsC    ▨ upsC and PFD0995 and PFD1000c

■ upsD    ■ upsE

Supplement: MOESM2 [file 9547830]
